# Supplementary material for: Astrocytic TIMP-1 regulates production of Anastellin, an inhibitor of oligodendrocyte differentiation and FTY720 responses
Source: PubMed Central journal article supplement — Proc Natl Acad Sci U S A. 2024 Jan 24;121(5):e2306816121. doi: 10.1073/pnas.2306816121 (PMC10835138; doi:10.1073/pnas.2306816121), 2024-01-24
Supplement: pnas.2306816121.sapp.pdf [file pnas.2306816121.sapp.pdf]

## **Supporting Information for**

### **Astrocytic TIMP-1 regulates production of Anastellin, a novel inhibitor of oligodendrocyte differentiation and FTY720 responses**

Pearl A. Sutter<sup>1#</sup>, Cory M. Willis<sup>1#</sup>, Antoine Menoret<sup>2</sup>, Alexandra M. Nicaise<sup>1</sup>, Anthony Sacino<sup>1</sup>,  
Arend. H. Sikkema<sup>3</sup>, Evan Jellison<sup>2</sup>, Kyaw K. Win<sup>4</sup>, David K. Han<sup>3</sup>,  
William Church<sup>5</sup>, Wia Baron<sup>3</sup>, Anthony T. Vella<sup>2</sup>, Stephen J. Crocker<sup>1,6</sup>

Departments of Neuroscience<sup>1</sup>, Immunology<sup>2</sup>, and Cell Biology<sup>4</sup>,  
University of Connecticut School of Medicine, Farmington, CT, USA  
Department of Biomedical Sciences of Cells & Systems<sup>3</sup>, Section Neurobiology, University of  
Groningen, University Medical Center Groningen, the Netherlands  
Department of Chemistry and Neuroscience Program<sup>5</sup>, Trinity College, Hartford, CT, USA  
#These authors contributed equally to this work.

Corresponding author Stephen J. Crocker, Ph.D.  
Email: crocker@uchc.edu

#### **This PDF file includes:**

Supporting text  
Figure S1

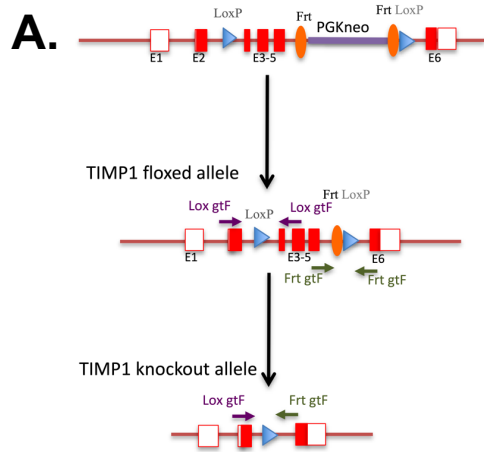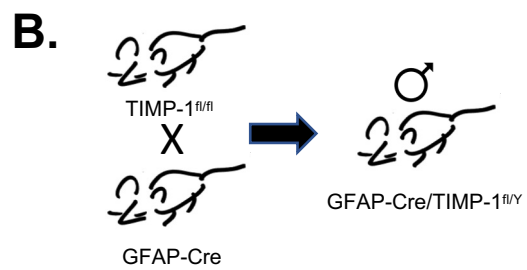

**C.** PCR genotyping of TIMP1 cKO mice

Genotyping of TIMP 5'LoxP site:  
 Lox gtF: 5'-GTGGTGTGTAGGTGCCTGTG  
 Lox gtR: 5'-GCAATCTCAGCACTTGGATG

Wt      256bp      Floxed    335bp

Genotyping of TIMP 3'LoxP/Frt site:  
 Frt gtF: 5'-TCATTGTCCAAGAGCCTTGC  
 Frt gtR: 5'-CTTGAAGTCACTCAGACAGG

Wt      328bp      Floxed    437bp

Genotyping of TIMP KO/Recombined allele:  
 Lox gtF: 5'-GTGGTGTGTAGGTGCCTGTG  
 Frt gtR: 5'-CTTGAAGTCACTCAGACAGG

Wt      No product.    KO/Recomb 436bp

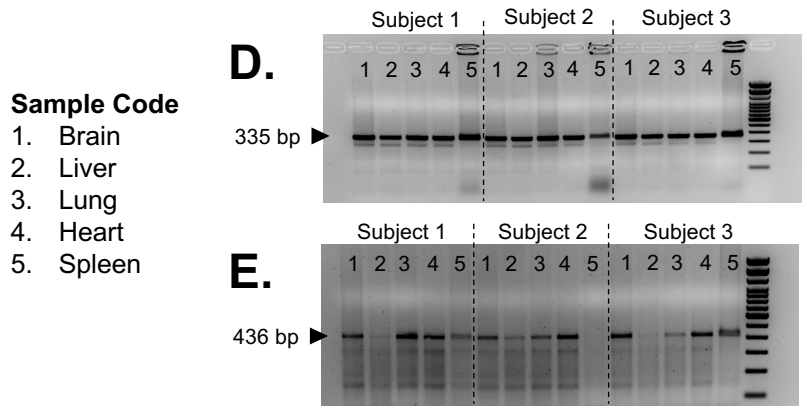

Lox gtF+LoxgtR

|        |        |
|--------|--------|
| Floxed | 335 bp |
| Wt     | 256 bp |

Lox gtF+Frt gtR

|           |            |
|-----------|------------|
| KO/Recomb | 436 bp     |
| Wt        | No product |

**SI Figure 1. Breeding strategy and genotyping of GFAP-Cre/TIMP-1<sup>fl/fl</sup> mice.** (A) Schematic of targeted TIMP-1 gene locus on X chromosome also indicating the locations of PCR primers for genotyping. (B) Floxed *timp-1* female mice when bred with male GFAP-Cre mice generated F1 generation males which were all Cre<sup>+</sup>/fl<sup>+</sup>. (C) PCR primers designed to identify and distinguish the floxed from Wt and recombined alleles. (D) Analysis of floxed allele in multiple organs from male progeny revealed presence of floxed allele, and not wildtype, in all organs tested, including brain, heart, lung, spleen, and liver. (E) PCR analysis of recombined floxed allele in male progeny identified consistent recombination in brain, but with variable recombination in other organs tested (heart, lung, liver and spleen). Thus, while astrocytic TIMP-1 recombination was consistently demonstrated, possible recombination in other tissues and cell types cannot be excluded in this study.
